# Supplementary material for: The nature of interspecific interactions and co‐diversification patterns, as illustrated by the fig microcosm
Source: PubMed Central journal article supplement (PMC6856861; doi:10.1111/nph.16176), 2019-10-04
Supplement: NPH-224-1304-s001.pdf [file NPH-224-1304-s001.pdf]

## **New *Phytologist* Supporting Information**

Article title: The nature of interspecific interactions and codiversification patterns, as illustrated by the fig microcosm

Authors: Ai-Ying Wang, Yan-Qiong Peng, Lawrence D. Harder, Jian-Feng Huang, Da-Rong Yang, Da-Yong Zhang, Wan-Jin Liao

Article acceptance date: 02 September 2019

The following Supporting Information is available for this article:

**Notes S1** Summary of phylogenetic results for *Ficus*, pollinating and galling wasps.

**Fig. S1** Cophylogenetic associations between *Ficus* and galling wasps, and pollinating and galling wasps, excluding secondary galling species.

**Fig. S2** The frequencies of different types of cophylogenetic events inferred by Jane for pairwise comparisons of the phylogenies of *Ficus*, pollinating wasps and galling wasps, excluding secondary galling species.

**Fig. S3** Phylogenetic trees for *Ficus*, pollinating wasps and galling wasps.

**Table S1** *Ficus* and fig wasp species included in the phylogenetic and cophylogenetic analyses.

Alphabetic footnotes identify subgenus for *Ficus* species, and family/subfamily for wasp species.

**Table S2** Taxonomic affinity, sexual systems and GenBank accession numbers of *Ficus* species involved in this study.

**Table S3** Ecological associations and roles, collection information and GenBank accession numbers for wasps included in this study.

**Notes S1** Summary of phylogenetic results of *Ficus*, pollinating and galling wasps.

***Ficus*** – Phylogenetic inference for the 26 fig species was based on 27, 43, 34 and 28 haplotypes for ETS, *G3pdh*, ITS and *trnL-F*, respectively, with a total sequence length of 2875 bp. All species were represented by sequences for all four genes, except ITS for *Ficus racemosa* (Table S2). The sampled *Ficus* species constitute a monophyletic clade (Fig. 2a, Supporting Information Fig. S3a), as inferred by Bayesian phylogenetic analysis (substitution models HKY+G for ETS, GTR+G for the other three genes: posterior probability = 1). Within this clade, subgenus *Urostigma* was recovered as polyphyletic, which is consistent with Cruaud *et al.*'s (2012) more extensive analysis. Subgenus *Sycomorus* was inferred as monophyletic with a posterior probability of 0.99, except for *F. racemosa*. Dioecious and monoecious figs do not represent separate monophyletic clades.

**Pollinating wasps** – For the 26 species of pollinating wasps and two cheating species, sequences were obtained for 129 individuals for 18S rRNA, 96 individuals for 28S rRNA and 111 individuals for *COI* (Table S2). The total aligned sequence length was 2107 bp. Two species were not represented by 28S rRNA sequences and three species were not represented by *COI* (Table S3). The phylogenetic relationships inferred for the 28 pollinating wasp species (GTR+G+I substitution model) were mostly consistent with those identified by Cruaud *et al.*'s (2012) global analysis (Fig. 2a, Supporting Information Fig. S3b). *Ceratosolen* and *Kradibia* formed monophyletic groups. In contrast, our analysis infers *Eupristina* as polyphyletic, as the two species from *Ficus microcarpa* ally most closely with *Deliagaon* and *Maniella*. This result differs from that of Cruaud *et al.* (2012), who inferred six *Eupristina* species as monophyletic, including four in our sample; however, they did not sample wasps from *F. microcarpa*. The cheating wasp species, *Eupristina* sp. 1 from *F. altissima* and *Eupristina* sp. 3 from

*F. microcarpa*, were each the closest relative of the pollinating wasp species using the same *Ficus* species (Supporting Information Fig. S3b, blue symbols).

**Galling wasps** – For the 33 galling wasp species, gene sequences included 106 individuals for 18S rRNA, 90 individuals for 28S rRNA and 78 individuals for *COI*, with a total aligned sequence length of 2083 bp (Table S2). Three and two species were not represented by sequences of 28S rRNA and *COI*, respectively (Table S3). For the galling wasps, Bayesian analysis (GTR+G substitution model) inferred subfamily Epichrysomallinae (Fig. 2b, c, orange symbols), Otitesellinae (Fig. 2b, c, green symbols) and genus *Sycophaga* (Fig. 2b, c, purple symbols) as monophyletic groups with > 0.99 posterior probabilities. However, most genera within subfamilies were not inferred as monophyletic groups. Four *Acophila* species and five *Walkerella* species formed a monophyletic group, respectively, with > 0.97 posterior probability (Fig. 2b, Supporting Information Fig. S3c).

## References

**Cruaud A, Ronsted N, Chantarasuwan B, Chou LS, Clement WL, Couloux A, Cousins B, Genson G, Harrison RD, Hanson PE, et al. 2012.** An extreme case of plant-insect codiversification: figs and fig-pollinating wasps. *Systematic Biology* **61**: 1029-1047.

**Fig. S1** Cophylogenetic patterns between (a) *Ficus* and galling wasps and (b) pollinating and galling wasps, excluding secondary galling species. Red and black tip labels for *Ficus* distinguish dioecious and monoecious species, respectively. Subfamily Epichrysomallinae, Otitesellinae and Sycophaginae were shown in orange, green and purple in (a) and (b). Solid lines connecting species in the left- and right-hand phylogenetic trees indicate observed associations. Line thickness varies positively with the contribution of a particular association to overall phylogenetic congruence. The “ex ...” labels identify the host fig species of individual wasp species. Abbreviations in (a) and (b) for figs: *F.* = *Ficus*. Abbreviations in (b) for fig pollinating wasps: *B.* = *Blastophaga*, *C.* = *Ceratosolen*, *D.* = *Deliagaon*, *E.* = *Eupristina*, *H.* = *Hederagaon*, *K.* = *Kradibia*, *P.* = *Platyscapa*, *U.* = *Umagaon*, *W.* = *Waterstoniella*. Abbreviations in (a) and (b) for galling wasps: *Ac.* = *Acophila*, *Cam.* = *Camarothorax*, *Mi.* = *Micranisa*, *Neo.* = *Neosycophila*, *Od.* = *Odontofroggatia*, *Sb.* = *Sycobia*, *Syg.* = *Sycophaga*, *Sym.* = *Sycophilomorpha*, *Wa.* = *Walkerella*.

(a)

**Ficus**

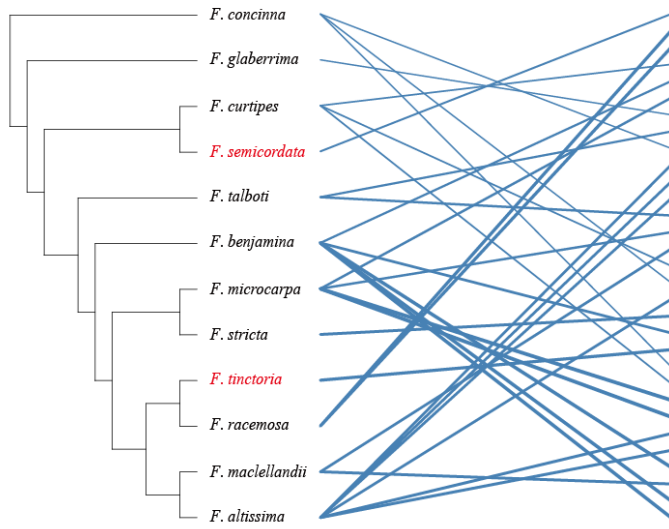

**galling wasps**

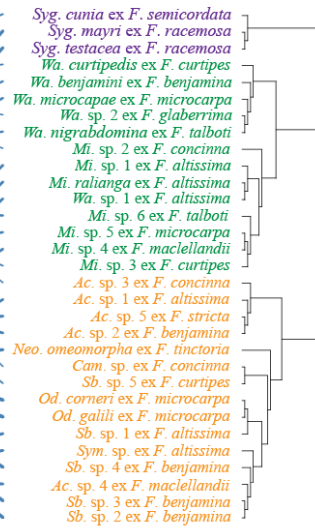

(b)

**pollinating wasps**

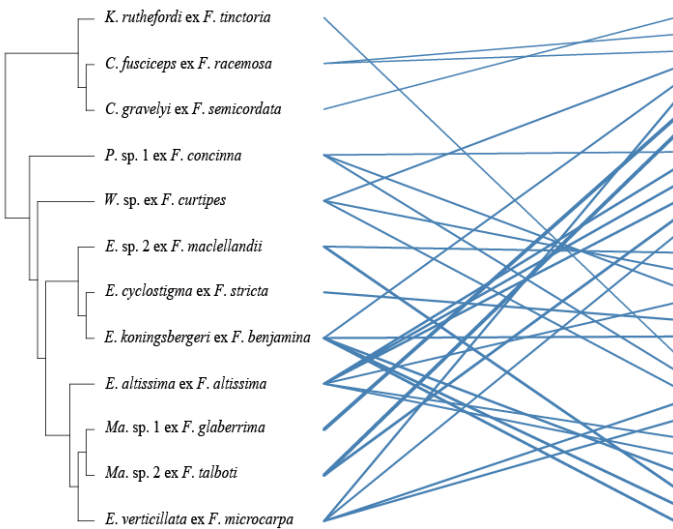

**galling wasps**

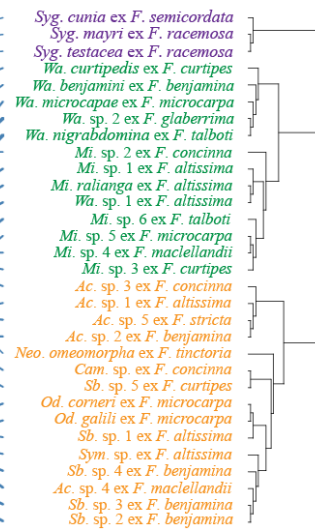

**Fig. S2** The frequencies of different types of cophylogenetic events (cospeciation, duplication, association switch, association loss) inferred by Jane for pairwise comparisons of the phylogenies of (a) pollinating wasps and galling wasps in the context of *Ficus* evolution, (b) *Ficus* and galling wasps in the context of pollinator evolution, and (c) galling wasps in the context of *Ficus* and pollinating wasp evolution, excluding secondary galling species respectively. X|Y denotes that clade Y was the reference clade and clade X was comparator the clade, and error bars indicate standard deviations for cases in which Jane identified several different sets of outcomes associated with the same minimal cost.

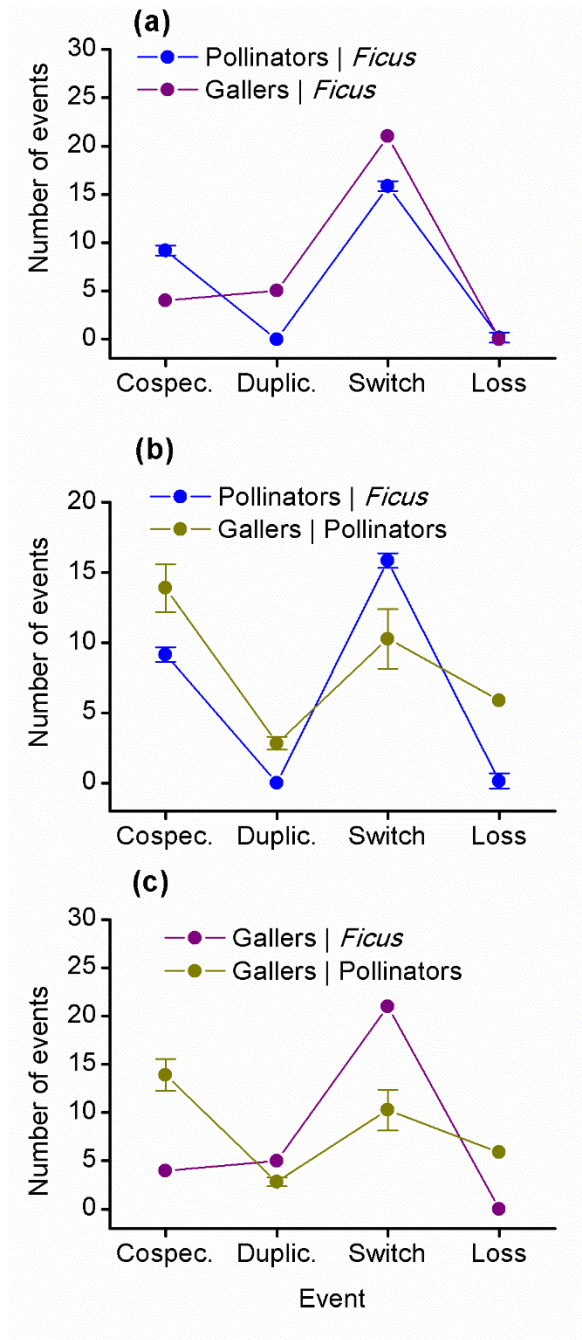

**Fig. S3** Phylogenetic trees for (a) *Ficus*, (b) pollinating wasps, (c) galling wasps and (d) galling wasps without secondary gallers. Bayesian posterior probabilities are shown above branches. Scale bars below each panel represent the number of substitution per site. Outgroups are shown in grey. In panel (a), red and black tip labels distinguish dioecious and monoecious fig species, respectively. Two cheater wasp species were shown in blue in (b). In panels b – d coloured boxes distinguish Kradibiinae (red in panel b), Epichrysomallinae (green in panels c and d), Otitesellinae (red in panels c and d) and *Sycophaga* (yellow in panels c and d).

Abbreviations: *F.* = *Ficus*; *B.* = *Blastophaga*, *C.* = *Ceratosolen*, *D.* = *Deliagaon*, *E.* = *Eupristina*, *H.* = *Hederagaon*, *K.* = *Kradibia*, *Ma.* = *Maniella*, *P.* = *Platyscapa*, *U.* = *Umagaon*, *W.* = *Waterstoniella*; *Ac.* = *Acophila*, *Cam.* = *Camarothorax*, *Dia.* = *Diaziella*, *Lip.* = *Lipothymus*, *Mi.* = *Micranisa*, *Neo.* = *Neosycophila*, *Od.* = *Odontofroggatia*, *Sb.* = *Sycobia*, *Syg.* = *Sycophaga*, *Sym.* = *Sycophilomorpha*, *Wa.* = *Walkerella*. “ex ...” identifies the host fig species for each wasp species.

(a)

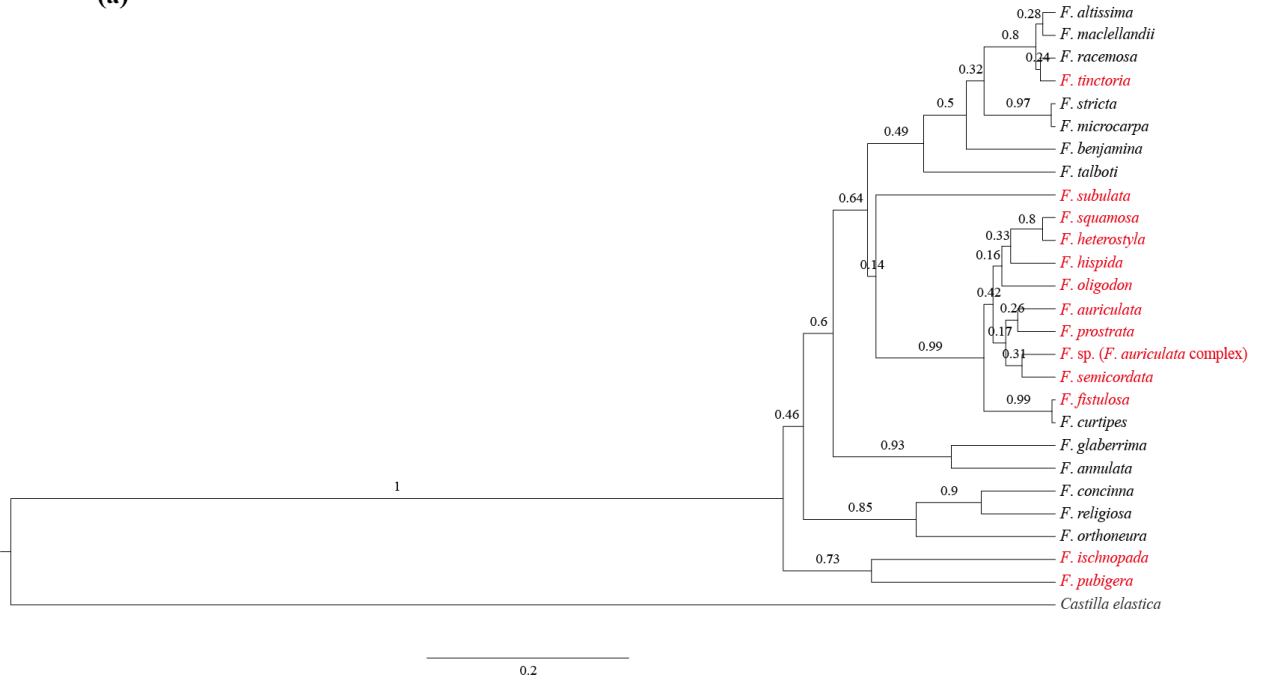

(b)

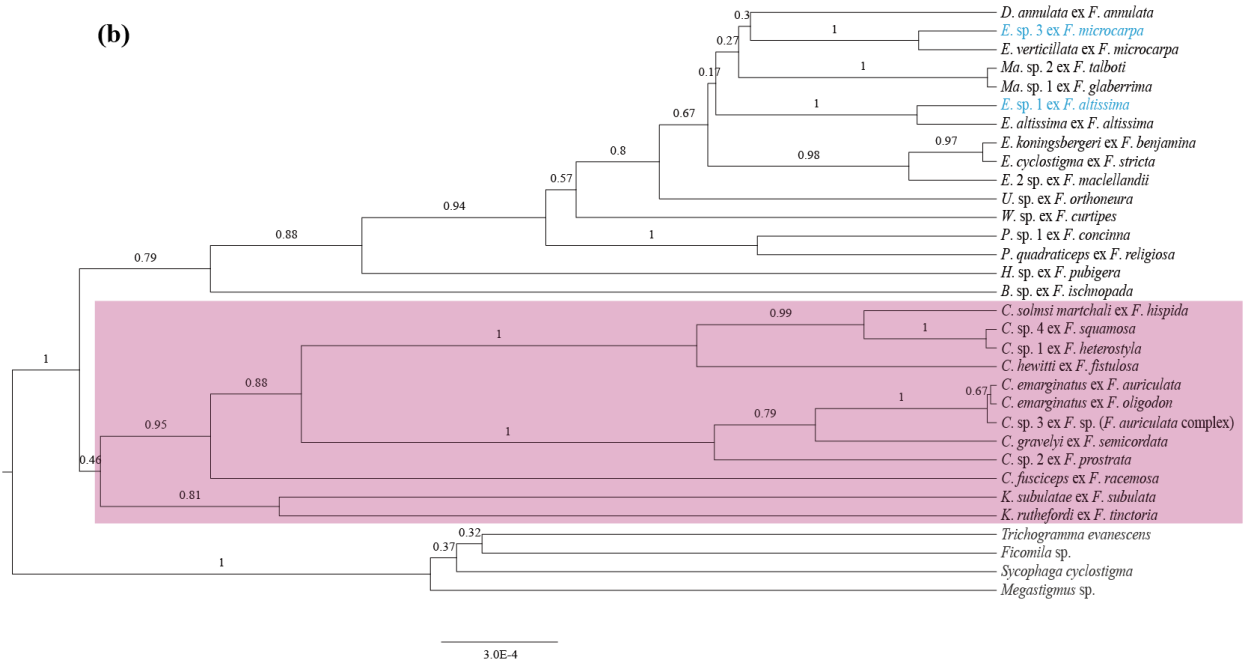



(c)

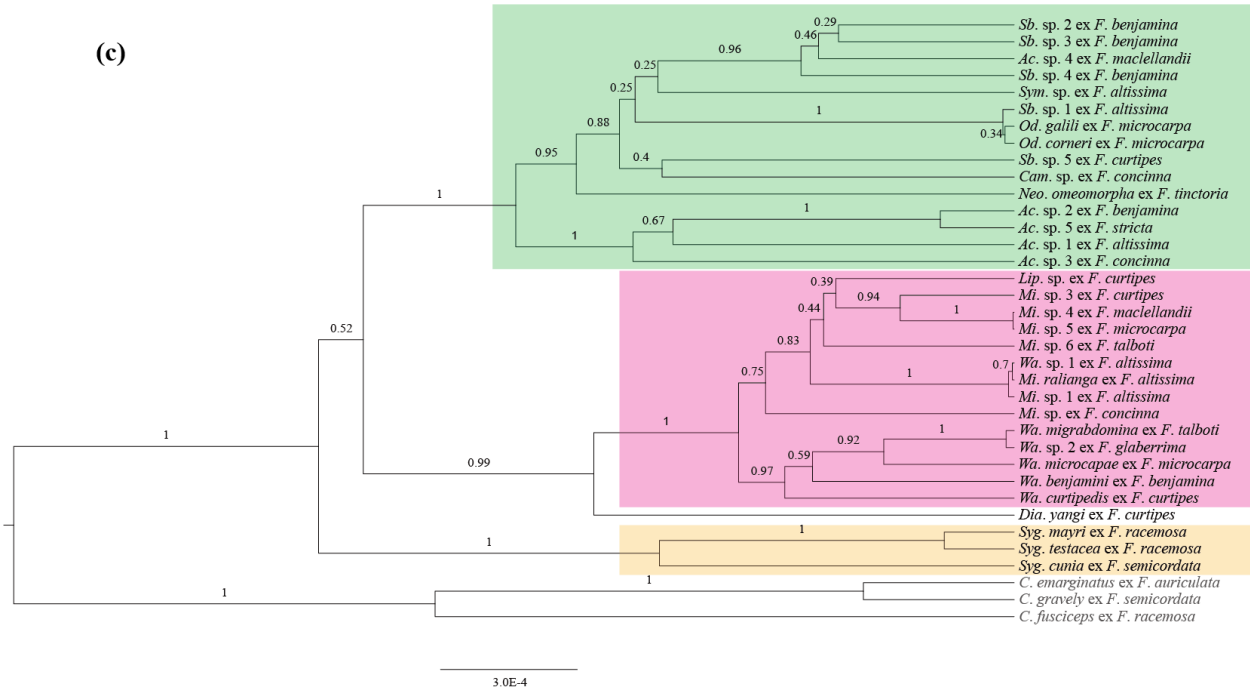

(d)

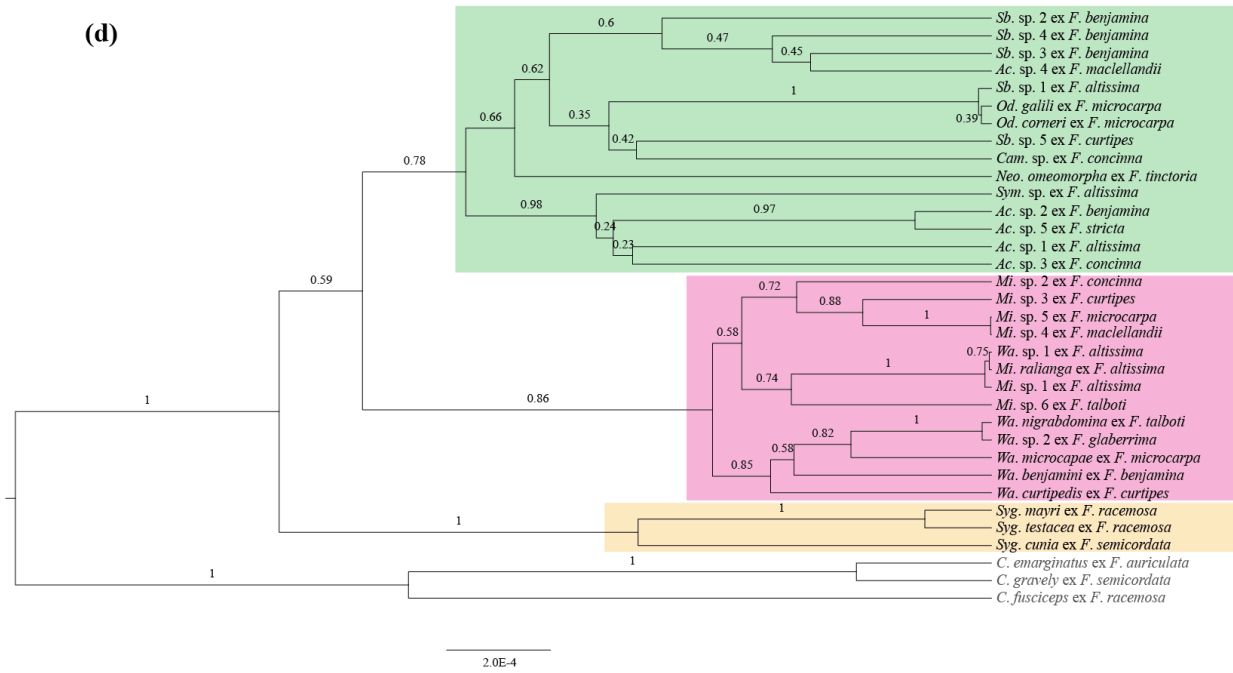

**Table S1** *Ficus* and fig wasp species included in the phylogenetic and cophylogenetic analyses.Alphabetic footnotes identify subgenus for *Ficus* species, and family/subfamily for wasp species.

| <i>Ficus</i>                                         | Abundance | Pollinating wasps                                                                        | Galling wasps                                                                                                                                                                                                                                     |
|------------------------------------------------------|-----------|------------------------------------------------------------------------------------------|---------------------------------------------------------------------------------------------------------------------------------------------------------------------------------------------------------------------------------------------------|
| <b>Diocious</b>                                      |           |                                                                                          |                                                                                                                                                                                                                                                   |
| <i>F. auriculata</i> <sup>Sco</sup>                  | common    | <i>Ceratosolen emarginatus</i> <sup>Ak</sup>                                             | - <sup>1</sup>                                                                                                                                                                                                                                    |
| <i>F. fistulosa</i> <sup>Sco</sup>                   | sporadic  | <i>Ceratosolen hewitti</i> <sup>Ak</sup>                                                 | -                                                                                                                                                                                                                                                 |
| <i>F. heterostyla</i> <sup>Sco</sup>                 | common    | <i>Ceratosolen</i> sp. 1 <sup>Ak</sup>                                                   | -                                                                                                                                                                                                                                                 |
| <i>F. hispida</i> <sup>Sco</sup>                     | common    | <i>Ceratosolen solmsi martchali</i> <sup>Ak</sup>                                        | -                                                                                                                                                                                                                                                 |
| <i>F. ischnopada</i> <sup>Fic</sup>                  | sporadic  | <i>Blastophaga</i> sp. <sup>Aa</sup>                                                     | -                                                                                                                                                                                                                                                 |
| <i>F. oligodon</i> <sup>Sco</sup>                    | common    | <i>Ceratosolen emarginatus</i> <sup>Ak</sup>                                             | -                                                                                                                                                                                                                                                 |
| <i>F. sp. (F. auriculata complex)</i> <sup>Sco</sup> | sporadic  | <i>Ceratosolen</i> sp. 3 <sup>Ak</sup>                                                   | -                                                                                                                                                                                                                                                 |
| <i>F. prostrata</i> <sup>Sco</sup>                   | sporadic  | <i>Ceratosolen</i> sp. 2 <sup>Ak</sup>                                                   | -                                                                                                                                                                                                                                                 |
| <i>F. pubigera</i> <sup>Sno</sup>                    | sporadic  | <i>Hederagaon</i> sp. <sup>Aa</sup>                                                      | -                                                                                                                                                                                                                                                 |
| <i>F. semicordata</i> <sup>Sco</sup>                 | common    | <i>Ceratosolen gravellyi</i> <sup>Ak</sup>                                               | <i>Sycophaga cunia</i> <sup>As</sup>                                                                                                                                                                                                              |
| <i>F. squamosa</i> <sup>Sco</sup>                    | common    | <i>Ceratosolen</i> sp. 4 <sup>Ak</sup>                                                   | -                                                                                                                                                                                                                                                 |
| <i>F. subulata</i> <sup>Sci</sup>                    | common    | <i>Kradibia subulatae</i> <sup>Ak</sup>                                                  | -                                                                                                                                                                                                                                                 |
| <i>F. tinctoria</i> <sup>Sci</sup>                   | common    | <i>Kradibia ruthefordi</i> <sup>Ak</sup>                                                 | <i>Neosycophila omeomorpha</i> <sup>Pe</sup>                                                                                                                                                                                                      |
| <b>Monoecious</b>                                    |           |                                                                                          |                                                                                                                                                                                                                                                   |
| <i>F. altissima</i> <sup>Uro</sup>                   | common    | <i>Eupristina altissima</i> <sup>Aa</sup><br><i>Eupristina</i> sp. 1 <sup>2, Aa</sup>    | <i>Acophila</i> sp. 1 <sup>Pe</sup><br><i>Micranisa ralianga</i> <sup>Po</sup><br><i>Micranisa</i> sp. 1 <sup>Po</sup><br><i>Sycobia</i> sp. 1 <sup>Pe</sup><br><i>Sycophilomorpha</i> sp. <sup>Pe</sup><br><i>Walkerella</i> sp. 1 <sup>Po</sup> |
| <i>F. annulata</i> <sup>Uro</sup>                    | sporadic  | <i>Deliagaon annulatae</i> <sup>Aa</sup>                                                 | -                                                                                                                                                                                                                                                 |
| <i>F. benjamina</i> <sup>Uro</sup>                   | common    | <i>Eupristina koningsbergeri</i> <sup>Aa</sup>                                           | <i>Acophila</i> sp. 2 <sup>Pe</sup><br><i>Sycobia</i> sp. 2 <sup>Pe</sup><br><i>Sycobia</i> sp. 3 <sup>Pe</sup><br><i>Sycobia</i> sp. 4 <sup>Pe</sup><br><i>Walkerella benjamini</i> <sup>Po</sup>                                                |
| <i>F. concinna</i> <sup>Uro</sup>                    | common    | <i>Platyscapa</i> sp. 1 <sup>Aa</sup>                                                    | <i>Acophila</i> sp. 3 <sup>Pe</sup><br><i>Camaro thorax</i> sp. <sup>Pe</sup><br><i>Micranisa</i> sp. 2 <sup>Po</sup>                                                                                                                             |
| <i>F. curtipes</i> <sup>Uro</sup>                    | common    | <i>Waterstoniella</i> sp. <sup>Aa</sup>                                                  | <i>Diaziella yangi</i> <sup>Ps</sup><br><i>Lipothymus</i> sp. <sup>Po</sup><br><i>Micranisa</i> sp. 3 <sup>Po</sup><br><i>Sycobia</i> sp. 5 <sup>Pe</sup><br><i>Walkerella curtipedis</i> <sup>Po</sup>                                           |
| <i>F. glaberrima</i> <sup>Uro</sup>                  | sporadic  | <i>Maniella</i> sp. 1 <sup>Aa</sup>                                                      | <i>Walkerella</i> sp. 2 <sup>Po</sup>                                                                                                                                                                                                             |
| <i>F. maclellandii</i> <sup>Uro</sup>                | common    | <i>Eupristina</i> sp. 2 <sup>Aa</sup>                                                    | <i>Acophila</i> sp. 4 <sup>Pe</sup><br><i>Micranisa</i> sp. 4 <sup>Po</sup>                                                                                                                                                                       |
| <i>F. microcarpa</i> <sup>Uro</sup>                  | common    | <i>Eupristina verticillata</i> <sup>Aa</sup><br><i>Eupristina</i> sp. 3 <sup>2, Aa</sup> | <i>Micranisa</i> sp. 5 <sup>Po</sup><br><i>Odontofroggatia corneri</i> <sup>Pe</sup><br><i>Odontofroggatia galili</i> <sup>Pe</sup>                                                                                                               |

---

|                                     |          |                                              |                                              |
|-------------------------------------|----------|----------------------------------------------|----------------------------------------------|
| <i>F. orthoneura</i> <sup>Uro</sup> | sporadic | <i>Umagaon</i> sp. <sup>Aa</sup>             | <i>Walkerella microcapae</i> <sup>Po</sup>   |
| <i>F. racemosa</i> <sup>Sco</sup>   | common   | <i>Ceratosolen fusciceps</i> <sup>Ak</sup>   | -                                            |
| <i>F. religiosa</i> <sup>Uro</sup>  | common   | <i>Platyscapa quadraticeps</i> <sup>Aa</sup> | <i>Sycophaga mayri</i> <sup>As</sup>         |
| <i>F. stricta</i> <sup>Uro</sup>    | sporadic | <i>Eupristina cyclostigma</i> <sup>Aa</sup>  | <i>Sycophaga testacea</i> <sup>As</sup>      |
| <i>F. talboti</i> <sup>Uro</sup>    | sporadic | <i>Maniella</i> sp. 2 <sup>Aa</sup>          | -                                            |
|                                     |          |                                              | <i>Acophila</i> sp. 5 <sup>Pe</sup>          |
|                                     |          |                                              | <i>Micranisa</i> sp. 6 <sup>Po</sup>         |
|                                     |          |                                              | <i>Walkerella nigrabdomina</i> <sup>Po</sup> |

---

Fic – Ficus, Sci – Sycidium, Sco – Sycomorus, Sno – Synoecia, Uro – Urostigma

Aa – Agaonidae/Agaoninae, Ak – Agaonidae/Kradibiinae, As – Agaonidae/Sycophaginae, Pe –

Pteromalidae/Epichrysomallinae, Po – Pteromalidae/Otitesellinae, Ps – Pteromalidae/Sycoecinae

<sup>1</sup> A dash, “-”, indicates that no galling wasps occupied synconia sampled from the associated fig species.

<sup>2</sup> This species acted as a cheater.

**Table S2** Taxonomic affinity, sexual systems and GenBank accession numbers of fig species involved in this study. Sequences downloaded from NCBI are indicated in bold font.

| Subgenus and species                             | Sexual system | ITS                                          | ETS                  | <i>G3pdh</i>                                             | <i>trnL-F</i>                    |
|--------------------------------------------------|---------------|----------------------------------------------|----------------------|----------------------------------------------------------|----------------------------------|
| <b>Subg. Sycomorus</b>                           |               |                                              |                      |                                                          |                                  |
| <i>Ficus auriculata</i> Lour.                    | Dioecy        | MK472748<br>MK472749<br>MK472750             | MK472721             | MK507022                                                 | MK472783                         |
| <i>Ficus fistulosa</i> Reinw. ex Blume           | Dioecy        | MK472755                                     | MK472726             | MK507035                                                 | MK472790                         |
| <i>Ficus heterostyla</i> Merr.                   | Dioecy        | MK472757                                     | MK472728             | MK507037                                                 | MK472792                         |
| <i>Ficus hispida</i> L. f.                       | Dioecy        | MK472758<br>MK472759<br>MK472760<br>MK472761 | MK472729             | MK507038                                                 | MK472793                         |
| <i>Ficus oligodon</i> Miq.                       | Dioecy        | MK472765                                     | MK472733             | MK507046                                                 | MK472797                         |
| <i>Ficus</i> sp. ( <i>F. auriculata</i> complex) | Dioecy        | MK472780                                     | MK472745             | MK507058<br>MK507059<br>MK507060<br>MK507061<br>MK507062 | MK472809                         |
| <i>Ficus prostrata</i> (Wall ex Miq.) Miq.       | Dioecy        | MK472768                                     | MK472736             | MK507049                                                 | MK472800                         |
| <i>Ficus racemosa</i> L.                         | Monoecy       | -                                            | MK472738             | MK507051                                                 | MK472802                         |
| <i>Ficus semicordata</i> Buch-Ham ex Sm          | Dioecy        | MK472771                                     | MK472740             | MK507053                                                 | MK472804                         |
| <i>Ficus squamosa</i> Roxb.                      | Dioecy        | MK472772                                     | MK472741             | MK507054                                                 | MK472805                         |
| <b>Subg. Urostigma</b>                           |               |                                              |                      |                                                          |                                  |
| <i>Ficus altissima</i> Blume                     | Monoecy       | MK472746                                     | MK472718<br>MK472719 | MK507015<br>MK507016                                     | MK472781                         |
| <i>Ficus annulata</i> Blume                      | Monoecy       | MK472747                                     | MK472720             | MK507017<br>MK507018<br>MK507019<br>MK507020<br>MK507021 | MK472782                         |
| <i>Ficus benamina</i> L.                         | Monoecy       | MK472751                                     | MK472722             | MK507023                                                 | MK472784<br>MK472785<br>MK472786 |
| <i>Ficus concinna</i> (Miq.) Miq.                | Monoecy       | MK472752                                     | MK472723             | MK507024<br>MK507025<br>MK507026<br>MK507027<br>MK507028 | MK472787                         |
| <i>Ficus curtipes</i> Corner                     | Monoecy       | MK472754                                     | MK472725             | MK507034                                                 | MK472789                         |
| <i>Ficus glaberrima</i> Blume                    | Monoecy       | MK472756                                     | MK472727             | MK507036                                                 | MK472791                         |
| <i>Ficus maclellandii</i> King                   | Monoecy       | MK472763                                     | MK472731             | MK507040                                                 | MK472795                         |
| <i>Ficus microcarpa</i> L.                       | Monoecy       | MK472764                                     | MK472732             | MK507041<br>MK507042<br>MK507043<br>MK507044<br>MK507045 | MK472796                         |

| Subgenus and species                         | Sexual system | ITS                                                      | ETS             | <i>G3pdh</i>    | <i>trnL-F</i>   |
|----------------------------------------------|---------------|----------------------------------------------------------|-----------------|-----------------|-----------------|
| <i>Ficus orthoneura</i><br>Léveillé & Vaniot | Monoecy       | MK472766                                                 | MK472734        | MK507047        | MK472798        |
| <i>Ficus religiosa</i> L.                    | Monoecy       | MK472770                                                 | MK472739        | MK507052        | MK472803        |
| <i>Ficus stricta</i> (Miq.) Miq.             | Monoecy       | MK472773                                                 | MK472742        | MK507055        | MK472806        |
| <i>Ficus talboti</i> (Blume)                 | Monoecy       | MK472767                                                 | MK472735        | MK507048        | MK472799        |
| <b>Subg. <i>Sycidium</i></b>                 |               |                                                          |                 |                 |                 |
| <i>Ficus subulata</i> Blume                  | Dioecy        | MK472774<br>MK472775<br>MK472776<br>MK472777<br>MK472778 | MK472743        | MK507056        | MK472807        |
| <i>Ficus tinctoria</i> Forst. f.             | Dioecy        | MK472779                                                 | MK472744        | MK507057        | MK472808        |
| <b>Subg. <i>Ficus</i></b>                    |               |                                                          |                 |                 |                 |
| <i>Ficus ischnopada</i> Miq.                 | Dioecy        | MK472762                                                 | MK472730        | MK507039        | MK472794        |
| <b>Subg. <i>Synoecia</i></b>                 |               |                                                          |                 |                 |                 |
| <i>Ficus pubigera</i> (Miq.)<br>Miq.         | Dioecy        | MK472769                                                 | MK472737        | MK507050        | MK472801        |
| <b>OUTGROUP</b>                              |               |                                                          |                 |                 |                 |
| <i>Castilla elastica</i> Sessé               |               | <b>AY730143</b>                                          | <b>AY730232</b> | <b>EF092327</b> | <b>AF501603</b> |

**Table S3** Ecological associations and roles, collection information and GenBank accession numbers for wasps included in this study.

Sequences downloaded from NCBI are indicated in bold font.

| Family, subfamily and species                  | Host <i>Ficus</i> species | Ecological role | Collection period | Number of individuals | 18S                                                                                                                  | 28S                              | <i>COI</i>                                                                                   |
|------------------------------------------------|---------------------------|-----------------|-------------------|-----------------------|----------------------------------------------------------------------------------------------------------------------|----------------------------------|----------------------------------------------------------------------------------------------|
| <b>Agaonidae</b>                               |                           |                 |                   |                       |                                                                                                                      |                                  |                                                                                              |
| <b>Agaoninae</b>                               |                           |                 |                   |                       |                                                                                                                      |                                  |                                                                                              |
| <i>Blastophaga</i> sp.                         | <i>F. ischnopada</i>      | pollinator      | 2008-2018         | 1                     | <b>JN102917</b><br>MK474058                                                                                          | <b>JN102696</b>                  | <b>JN103262</b>                                                                              |
| <i>Deliagaon annulatae</i> Wiebes, 1977        | <i>F. annulata</i>        | pollinator      | 2008-2018         | 8                     | MK474013<br>MK474014<br>MK474015<br>MK474016<br>MK474017<br>MK474018<br>MK474019<br>MK474020                         | MK495117<br>MK495118<br>MK495119 | MK543400<br>MK543401<br>MK543402<br>MK543403<br>MK543404<br>MK543405<br>MK543406<br>MK543407 |
| <i>Eupristina altissima</i> Bala. & Abd., 1981 | <i>F. altissima</i>       | pollinator      | 2014-2015         | 4                     | MK473970<br>MK473971<br>MK473972<br>MK473973                                                                         | MK495091                         | MK559358<br>MK543367<br>MK543368<br>MK543369                                                 |
| <i>Eupristina cyclostigma</i> Wiebes, 1992     | <i>F. stricta</i>         | pollinator      | 2008-2018         | 1                     | <b>GQ367607</b><br>MK474057                                                                                          | <b>GQ367804</b>                  | <b>GQ367900</b>                                                                              |
| <i>Eupristina koningsbergeri</i> Grandi, 1916  | <i>F. benjamina</i>       | pollinator      | 2014-2015         | 6                     | MK473974<br>MK473975<br>MK473976<br>MK473977                                                                         | MK495092                         | MK543373<br>MK543374<br>MK543375<br>MK543376<br>MK543377<br>MK543378                         |
| <i>Eupristina</i> sp. 1                        | <i>F. altissima</i>       | cheater         | 2014-2015         | 11                    | MK473978<br>MK473979<br>MK473980<br>MK473981<br>MK473982<br>MK473983<br>MK473984<br>MK473985<br>MK473986<br>MK473987 | -                                | -                                                                                            |



| Family, subfamily and species             | Host <i>Ficus</i> species | Ecological role | Collection period | Number of individuals | 18S      | 28S      | <i>COI</i> |
|-------------------------------------------|---------------------------|-----------------|-------------------|-----------------------|----------|----------|------------|
| <i>Platyscapa</i> sp. 1                   | <i>F. concinna</i>        | pollinator      | 2014-2015         | 5                     | MK474028 | MK495127 | MK543415   |
|                                           |                           |                 |                   |                       | MK474029 | MK495128 | MK543408   |
|                                           |                           |                 |                   |                       | MK474030 | MK495129 | MK543409   |
|                                           |                           |                 |                   |                       | MK474031 | MK495130 | MK543410   |
|                                           |                           |                 |                   |                       | MK474032 |          | MK543411   |
| <i>Umagaon</i> sp.                        | <i>F. orthoneura</i>      | pollinator      | 2008-2018         | 3                     | MK474047 | MK495139 | MK543425   |
|                                           |                           |                 |                   |                       | MK474048 | MK495140 | MK543426   |
|                                           |                           |                 |                   |                       | MK474049 | MK495141 | MK543427   |
| <i>Waterstoniella</i> sp.                 | <i>F. curtipes</i>        | pollinator      | 2014-2015         | 4                     | MK474050 | MK495142 | MK543428   |
|                                           |                           |                 |                   |                       | MK474051 |          | MK543429   |
|                                           |                           |                 |                   |                       | MK474052 |          | MK543430   |
|                                           |                           |                 |                   |                       | MK474053 |          | MK543431   |
| <b>Kradibiinae</b>                        |                           |                 |                   |                       |          |          |            |
| <i>Ceratosolen emarginatus</i> Mayr, 1906 | <i>F. auriculata</i>      | pollinator      | 2014-2015         | 6                     | MK473930 | MK495055 | MK543332   |
|                                           |                           |                 |                   |                       | MK473931 | MK495056 | MK543333   |
|                                           |                           |                 |                   |                       | MK473932 | MK495057 | MK543334   |
|                                           |                           |                 |                   |                       | MK473933 | MK495058 | MK543335   |
|                                           |                           |                 |                   |                       | MK473934 | MK495059 | MK543336   |
| <i>Ceratosolen emarginatus</i> Mayr, 1906 | <i>F. oligodon</i>        | pollinator      | 2014-2015         | 10                    | MK473935 | MK495060 | MK543337   |
|                                           |                           |                 |                   |                       | MK473936 | MK495061 | MK543338   |
|                                           |                           |                 |                   |                       | MK473937 | MK495062 | MK543339   |
|                                           |                           |                 |                   |                       | MK473938 | MK495063 | MK543340   |
|                                           |                           |                 |                   |                       | MK473939 | MK495064 | MK543341   |
|                                           |                           |                 |                   |                       | MK473940 | MK495065 | MK559357   |
|                                           |                           |                 |                   |                       | MK473941 | MK495066 | MK543342   |
|                                           |                           |                 |                   |                       | MK473942 | MK495067 | MK543343   |
|                                           |                           |                 |                   |                       | MK473943 | MK495068 | MK543344   |
|                                           |                           |                 |                   |                       | MK473944 | MK495069 | MK543345   |
| <i>Ceratosolen fusciceps</i> (Mayr, 1885) | <i>F. racemosa</i>        | pollinator      | 2014-2015         | 5                     | MK473945 | MK495070 | MK543346   |
|                                           |                           |                 |                   |                       | MK473946 | MK495071 | MK543347   |
|                                           |                           |                 |                   |                       | MK473947 | MK495072 | MK543348   |
|                                           |                           |                 |                   |                       | MK473948 | MK495073 | MK543349   |
|                                           |                           |                 |                   |                       | MK473949 |          | MK543350   |
| <i>Ceratosolen graveleyi</i> Grandi, 1916 | <i>F. semicordata</i>     | pollinator      | 2014-2015         | 5                     | MK473950 |          | MK543351   |
|                                           |                           |                 |                   |                       | MK473951 | MK495074 | MK543352   |
|                                           |                           |                 |                   |                       | MK473952 | MK495075 | MK543353   |
|                                           |                           |                 |                   |                       | MK473953 | MK495076 | MK543354   |



| Family, subfamily and species                  | Host <i>Ficus</i> species                        | Ecological role | Collection period | Number of individuals | 18S             | 28S             | COI             |
|------------------------------------------------|--------------------------------------------------|-----------------|-------------------|-----------------------|-----------------|-----------------|-----------------|
| <i>Ceratosolen hewitti</i> Waterston, 1921     | <i>F. fistulosa</i>                              | pollinator      | 2008-2018         | 1                     | MK473954        | MK495077        | MK543355        |
|                                                |                                                  |                 |                   |                       | MK473955        | MK495078        | MK543356        |
|                                                |                                                  |                 |                   |                       | <b>JN102908</b> | <b>JN102690</b> | <b>JN103253</b> |
| <i>Ceratosolen solmsi martchali</i> Mayr, 1906 | <i>F. hispida</i>                                | pollinator      | 2014-2015         | 5                     | MK543432        |                 |                 |
|                                                |                                                  |                 |                   |                       | MK473961        | MK495084        | MK543362        |
|                                                |                                                  |                 |                   |                       | MK473962        | MK495085        | MK543363        |
|                                                |                                                  |                 |                   |                       | MK473963        | MK495086        | MK543364        |
|                                                |                                                  |                 |                   |                       | MK473964        | MK495087        | MK543365        |
|                                                |                                                  |                 |                   |                       | MK473965        |                 |                 |
| <i>Ceratosolen</i> sp. 1                       | <i>F. heterostyla</i>                            | pollinator      | 2014-2015         | 5                     | MK473956        | MK495079        | MK543357        |
|                                                |                                                  |                 |                   |                       | MK473957        | MK495080        | MK543358        |
|                                                |                                                  |                 |                   |                       | MK473958        | MK495081        | MK543359        |
|                                                |                                                  |                 |                   |                       | MK473959        | MK495082        | MK543360        |
|                                                |                                                  |                 |                   |                       | MK473960        | MK495083        | MK543361        |
| <i>Ceratosolen</i> sp. 2                       | <i>F. prostrata</i>                              | pollinator      | 2008-2018         | 1                     | MK473966        | <b>JN102677</b> | MK543366        |
| <i>Ceratosolen</i> sp. 3                       | <i>F. sp.</i><br>( <i>F. auriculata</i> complex) | pollinator      | 2014-2015         | 3                     | MK473967        | MK495088        | MK543367        |
|                                                |                                                  |                 |                   |                       | MK473968        | MK495089        | MK543368        |
|                                                |                                                  |                 |                   |                       | MK473969        | MK495090        | MK543369        |
| <i>Ceratosolen</i> sp. 4                       | <i>F. squamosa</i>                               | pollinator      | 2014-2015         | 2                     | <b>JN102915</b> | <b>JN102695</b> | <b>JN103260</b> |
|                                                |                                                  |                 |                   |                       | MK474055        |                 |                 |
|                                                |                                                  |                 |                   |                       | MK474056        |                 |                 |
| <i>Kradibia ruthefordi</i> (Waterston, 1920)   | <i>F. tinctoria</i>                              | pollinator      | 2014-2015         | 7                     | MK474021        | MK495120        | -               |
|                                                |                                                  |                 |                   |                       | MK474022        | MK495121        |                 |
|                                                |                                                  |                 |                   |                       | MK474023        | MK495122        |                 |
|                                                |                                                  |                 |                   |                       | MK474024        | MK495123        |                 |
|                                                |                                                  |                 |                   |                       | MK474025        | MK495124        |                 |
|                                                |                                                  |                 |                   |                       | MK474026        | MK495125        |                 |
|                                                |                                                  |                 |                   |                       | MK474027        | MK495126        |                 |
| <i>Kradibia subulatae</i> (Hill, 1969)         | <i>F. subulata</i>                               | pollinator      | 2008-2018         | 0                     | <b>JN102920</b> | <b>JN102699</b> | <b>JN103265</b> |
| <b>Sycophaginae</b>                            |                                                  |                 |                   |                       |                 |                 |                 |
| <i>Sycophaga cunia</i>                         | <i>F. semicordata</i>                            | galler          | 2014-2015         | 5                     | MK495037        | MK495217        | MK530774        |
|                                                |                                                  |                 |                   |                       | MK495038        | MK495218        | MK530775        |
|                                                |                                                  |                 |                   |                       | MK495039        | MK495219        | MK530776        |
|                                                |                                                  |                 |                   |                       | MK495040        | MK495220        | MK530777        |
|                                                |                                                  |                 |                   |                       | MK495041        | MK495221        | MK530778        |
| <i>Sycophaga mayri</i>                         | <i>F. racemosa</i>                               | galler          | 2014-2015         | 5                     | MK495042        | MK495222        | MK530779        |
|                                                |                                                  |                 |                   |                       | MK495043        | MK495223        | MK543434        |
|                                                |                                                  |                 |                   |                       |                 |                 |                 |

| Family, subfamily and species              | Host <i>Ficus</i> species | Ecological role | Collection period | Number of individuals | 18S      | 28S      | COI      |
|--------------------------------------------|---------------------------|-----------------|-------------------|-----------------------|----------|----------|----------|
|                                            |                           |                 |                   |                       | MK495044 | MK495224 |          |
|                                            |                           |                 |                   |                       | MK495045 | MK495225 |          |
|                                            |                           |                 |                   |                       | MK495046 |          |          |
| <i>Sycophaga testacea</i> (Mayr, 1885)     | <i>F. racemosa</i>        | galler          | 2014-2015         | 5                     | MK495047 | MK495226 | MK530780 |
|                                            |                           |                 |                   |                       | MK495048 | MK495227 | MK530781 |
|                                            |                           |                 |                   |                       | MK495049 | MK495228 | MK530782 |
|                                            |                           |                 |                   |                       | MK495050 | MK495229 | MK530783 |
|                                            |                           |                 |                   |                       | MK495051 | MK495230 | MK530784 |
| <b>Pteromalidae</b>                        |                           |                 |                   |                       |          |          |          |
| <b>Epichrysomallinae</b>                   |                           |                 |                   |                       |          |          |          |
| <i>Acophila</i> sp. 1                      | <i>F. altissima</i>       | galler          | 2014-2015         | 5                     | MK494956 | MK495150 | MK530718 |
|                                            |                           |                 |                   |                       | MK494957 | MK495151 | MK530719 |
|                                            |                           |                 |                   |                       | MK494958 | MK495152 | MK530720 |
|                                            |                           |                 |                   |                       | MK494959 |          |          |
|                                            |                           |                 |                   |                       | MK494960 |          |          |
| <i>Acophila</i> sp. 2                      | <i>F. benjamina</i>       | galler          | 2014-2015         | 4                     | MK494949 | MK495143 | MK530713 |
|                                            |                           |                 |                   |                       | MK494950 | MK495144 | MK530714 |
|                                            |                           |                 |                   |                       | MK494951 | MK495145 |          |
|                                            |                           |                 |                   |                       | MK494952 | MK495146 |          |
| <i>Acophila</i> sp. 3                      | <i>F. concinna</i>        | galler          | 2014-2015         | 1                     | MK494953 | MK495147 | MK530715 |
| <i>Acophila</i> sp. 4                      | <i>F. maclellandii</i>    | galler          | 2008-2018         | 2                     | MK494954 | MK495148 | MK530716 |
|                                            |                           |                 |                   |                       | MK494955 | MK495149 | MK530717 |
| <i>Acophila</i> sp. 5                      | <i>F. stricta</i>         | galler          | 2008-2018         | 1                     | MK495054 | MK495232 | MK530787 |
| <i>Camarothonax</i> sp.                    | <i>F. concinna</i>        | galler          | 2014-2015         | 1                     | MK494971 | MK495161 | MK543435 |
| <i>Neosycophila omeomorpha</i> Grandi,1923 | <i>F. tinctoria</i>       | galler          | 2014-2015         | 6                     | MK494972 | MK495162 | MK530728 |
|                                            |                           |                 |                   |                       | MK494973 | MK495163 | MK530729 |
|                                            |                           |                 |                   |                       | MK494974 | MK495164 | MK530730 |
|                                            |                           |                 |                   |                       | MK494975 | MK495165 | MK530731 |
|                                            |                           |                 |                   |                       | MK494976 | MK495166 | MK530732 |
|                                            |                           |                 |                   |                       | MK494977 | MK495167 | MK530733 |
| <i>Odontofroggatia corneri</i> Wiebes,1980 | <i>F. microcarpa</i>      | galler          | 2014-2015         | 5                     | MK494978 | MK495168 | MK530734 |
|                                            |                           |                 |                   |                       | MK494979 | MK495169 | MK530735 |
|                                            |                           |                 |                   |                       | MK494980 | MK495170 | MK530736 |
|                                            |                           |                 |                   |                       | MK494981 | MK495171 | MK530737 |
|                                            |                           |                 |                   |                       | MK494982 | MK495172 |          |
| <i>Odontofroggatia galili</i> Wiebes,1980  | <i>F. microcarpa</i>      | galler          | 2014-2015         | 1                     | MK494983 | MK495173 | MK530738 |
| <i>Sycobia</i> sp. 1                       | <i>F. altissima</i>       | galler          | 2014-2015         | 1                     | MK494961 | MK495153 | MK530721 |
| <i>Sycobia</i> sp. 2                       | <i>F. benjamina</i>       | galler          | 2014-2015         | 2                     | MK494963 | -        | -        |

| Family, subfamily and species                         | Host <i>Ficus</i> species | Ecological role  | Collection period | Number of individuals | 18S      | 28S      | COI      |
|-------------------------------------------------------|---------------------------|------------------|-------------------|-----------------------|----------|----------|----------|
| <i>Sycobia</i> sp. 3                                  | <i>F. benjamina</i>       | galler           | 2014-2015         | 5                     | MK494964 |          |          |
|                                                       |                           |                  |                   |                       | MK494965 | MK495155 | MK530723 |
|                                                       |                           |                  |                   |                       | MK494966 | MK495156 | MK530724 |
|                                                       |                           |                  |                   |                       | MK494967 | MK495157 | MK530725 |
|                                                       |                           |                  |                   |                       | MK494968 | MK495158 | MK530726 |
| <i>Sycobia</i> sp. 4                                  | <i>F. benjamina</i>       | galler           | 2014-2015         | 1                     | MK494969 | MK495159 |          |
|                                                       |                           |                  |                   |                       | MK494970 | MK495160 | MK530727 |
| <i>Sycobia</i> sp. 5                                  | <i>F. curtipes</i>        | galler           | 2014-2015         | 1                     | MK494962 | MK495154 | MK530722 |
| <i>Sycophilomorpha</i> sp.                            | <i>F. altissima</i>       | galler           | 2014-2015         | 1                     | MK494984 | -        | -        |
| <b>Otitesellinae</b>                                  |                           |                  |                   |                       |          |          |          |
| <i>Lipothymus</i> sp.                                 | <i>F. curtipes</i>        | secondary galler | 2014-2015         | 1                     | MK495053 | -        | MK530786 |
| <i>Micranisa ralianga</i> Mathew & Balakrishnan, 1981 | <i>F. altissima</i>       | galler           | 2014-2015         | 2                     | MK495011 | MK495194 | MK530759 |
|                                                       |                           |                  |                   |                       | MK495012 |          |          |
|                                                       |                           |                  |                   |                       | MK495013 |          |          |
|                                                       |                           |                  |                   |                       | MK495014 |          |          |
| <i>Micranisa</i> sp. 1                                | <i>F. altissima</i>       | galler           | 2014-2015         | 6                     | MK495005 | MK495193 | MK530758 |
|                                                       |                           |                  |                   |                       | MK495006 |          |          |
|                                                       |                           |                  |                   |                       | MK495007 |          |          |
|                                                       |                           |                  |                   |                       | MK495008 |          |          |
|                                                       |                           |                  |                   |                       | MK495009 |          |          |
|                                                       |                           |                  |                   |                       | MK495010 |          |          |
| <i>Micranisa</i> sp. 2                                | <i>F. concinna</i>        | galler           | 2014-2015         | 1                     | MK495015 | MK495195 | MK530760 |
| <i>Micranisa</i> sp. 3                                | <i>F. curtipes</i>        | galler           | 2014-2015         | 1                     | MK494985 | MK495174 | MK530739 |
| <i>Micranisa</i> sp. 4                                | <i>F. maclellandii</i>    | galler           | 2008-2018         | 6                     | MK494986 | MK495175 | MK530740 |
|                                                       |                           |                  |                   |                       | MK494987 | MK495176 | MK530741 |
|                                                       |                           |                  |                   |                       | MK494988 | MK495177 | MK530742 |
|                                                       |                           |                  |                   |                       | MK494989 | MK495178 | MK530743 |
|                                                       |                           |                  |                   |                       | MK494990 | MK495179 | MK530744 |
|                                                       |                           |                  |                   |                       | MK494991 | MK495180 | MK530745 |
| <i>Micranisa</i> sp. 5                                | <i>F. microcarpa</i>      | galler           | 2014-2015         | 7                     | MK494992 | MK495181 | MK530746 |
|                                                       |                           |                  |                   |                       | MK494993 | MK495182 | MK530747 |
|                                                       |                           |                  |                   |                       | MK494994 | MK495183 | MK530748 |
|                                                       |                           |                  |                   |                       | MK494995 | MK495184 | MK530749 |
|                                                       |                           |                  |                   |                       | MK494996 | MK495185 | MK530750 |
|                                                       |                           |                  |                   |                       | MK494997 | MK495186 | MK530751 |
|                                                       |                           |                  |                   |                       | MK494998 |          |          |
| <i>Micranisa</i> sp. 6                                | <i>F. talboti</i>         | galler           | 2008-2018         | 6                     | MK494999 | MK495187 | MK530752 |

| Family, subfamily and species                   | Host <i>Ficus</i> species | Ecological role  | Collection period | Number of individuals | 18S             | 28S             | COI             |
|-------------------------------------------------|---------------------------|------------------|-------------------|-----------------------|-----------------|-----------------|-----------------|
| <i>Walkerella benjamini</i> Joseph, 1957        | <i>F. benjamina</i>       | galler           | 2014-2015         | 6                     | MK494500        | MK495188        | MK530753        |
|                                                 |                           |                  |                   |                       | MK494501        | MK495189        | MK530754        |
|                                                 |                           |                  |                   |                       | MK494502        | MK495190        | MK530755        |
|                                                 |                           |                  |                   |                       | MK494503        | MK495191        | MK530756        |
|                                                 |                           |                  |                   |                       | MK494504        | MK495192        | MK530757        |
|                                                 |                           |                  |                   |                       | MK495026        | MK495206        | MK530768        |
|                                                 |                           |                  |                   |                       | MK495027        | MK495207        | MK530769        |
|                                                 |                           |                  |                   |                       | MK495028        | MK495208        |                 |
|                                                 |                           |                  |                   |                       | MK495029        | MK495209        |                 |
|                                                 |                           |                  |                   |                       | MK495030        | MK495210        |                 |
| <i>Walkerella curtipedis</i> Ma & Yang          | <i>F. curtipes</i>        | galler           | 2014-2015         | 1                     | MK495016        | MK495196        | MK530761        |
|                                                 |                           |                  |                   |                       | MK495031        | MK495212        | MK530770        |
| <i>Walkerella microcapae</i> Bouček, 1993       | <i>F. microcarpa</i>      | galler           | 2014-2015         | 6                     | MK495032        | MK495213        | MK530771        |
|                                                 |                           |                  |                   |                       | MK495033        | MK495214        | MK530772        |
|                                                 |                           |                  |                   |                       | MK495034        | MK495215        | MK530773        |
|                                                 |                           |                  |                   |                       | MK495035        | MK495216        |                 |
|                                                 |                           |                  |                   |                       | MK495036        |                 |                 |
| <i>Walkerella nigrabdomina</i> Ma & Yang        | <i>F. talboti</i>         | galler           | 2008-2018         | 5                     | MK495020        | MK495200        | MK530764        |
|                                                 |                           |                  |                   |                       | MK495021        | MK495201        | MK530765        |
|                                                 |                           |                  |                   |                       | MK495022        | MK495202        | MK530766        |
|                                                 |                           |                  |                   |                       | MK495023        | MK495203        | MK543433        |
|                                                 |                           |                  |                   |                       | MK495024        | MK495204        |                 |
| <i>Walkerella</i> sp. 1                         | <i>F. altissima</i>       | galler           | 2014-2015         | 1                     | MK495025        | MK495205        | MK530767        |
| <i>Walkerella</i> sp. 2                         | <i>F. glaberrima</i>      | galler           | 2008-2018         | 3                     | MK495017        | MK495197        | MK530762        |
|                                                 |                           |                  |                   |                       | MK495018        | MK495198        | MK530763        |
|                                                 |                           |                  |                   |                       | MK495019        | MK495199        |                 |
| <b>Sycocinae</b>                                |                           |                  |                   |                       |                 |                 |                 |
| <i>Diaziella yangi</i> van Noort & Rasplus 2006 | <i>F. curtipes</i>        | secondary galler | 2014-2015         | 1                     | MK495052        | MK495231        | MK530785        |
| <b>OUTGROUP</b>                                 |                           |                  |                   |                       |                 |                 |                 |
| <i>Ficomila</i> sp.                             |                           |                  |                   |                       | <b>GQ367656</b> | <b>GQ367850</b> | <b>GQ367946</b> |
| <i>Megastigmus</i> sp.                          |                           |                  |                   |                       | <b>GQ367582</b> | <b>GQ367780</b> | <b>GQ367876</b> |
| <i>Sycophaga cyclostigma</i> Waterston, 1916    |                           |                  |                   |                       | <b>GQ367651</b> | <b>GQ367845</b> | <b>GQ367941</b> |
| <i>Trichogramma evanescens</i> Westwood, 1833   |                           |                  |                   |                       | <b>GQ367672</b> | <b>GQ367865</b> | <b>GQ367960</b> |
